# Supplementary material for: Longitude Position in a Time Zone and Cancer Risk in the United States
Source: Oxford University Press journal article supplement (doi:10.1158/1055-9965.epi-16-1029), 2017-04-27
Supplement: 10559965epi161029-sup-176280_2_supp_3930747_fn9pyy.xls [file 10559965epi161029-sup-176280_2_supp_3930747_fn9pyy.xls]

## Sheet: Sheet1
Supplementary Table 1. Average age-adjusted cancer ratesa across timezones for each tertile of the PTZb
				Men										Women
Cancerc	Eastern			Middle			Western				Eastern			Middle			Western
	Count	Rate	95% CI	Count	Rate	95% CI	Count	Rate	95% CI		Count	Rate	95% CI	Count	Rate	95% CI	Count	Rate	95% CI
All Cancers	204827	522.08	(519.82, 524.35)	1257261	539.96	(539.01, 540.9)	633306	564.68	(563.29, 566.07)		187968	407.18	(405.34, 409.03)	1208067	427.79	(427.03, 428.56)	576479	428.33	(427.23, 429.44)
Oral Cavity and Pharynxd	5676	13.71	(13.35, 14.06)	31714	12.77	(12.63, 12.91)	17499	14.52	(14.3, 14.74)		2178	4.69	(4.49, 4.89)	13800	4.83	(4.75, 4.91)	7221	5.3	(5.17, 5.42)
Esophagus	3183	8.09	(7.81, 8.37)	18337	7.86	(7.75, 7.98)	9436	8.27	(8.1, 8.44)		801	1.69	(1.57, 1.8)	5513	1.87	(1.82, 1.92)	2437	1.74	(1.67, 1.81)
Esophagus: Adenocarcinoma	2148	5.42	(5.19, 5.65)	12491	5.33	(5.23, 5.42)	6716	5.84	(5.7, 5.98)		296	0.62	(0.55, 0.69)	2156	0.73	(0.7, 0.76)	996	0.71	(0.67, 0.76)
Esophagus: Squamous Cell	692	1.79	(1.65, 1.92)	4056	1.75	(1.7, 1.81)	1822	1.62	(1.54, 1.69)		385	0.81	(0.73, 0.9)	2698	0.93	(0.89, 0.96)	1067	0.77	(0.72, 0.81)
Stomach	3478	8.99	(8.69, 9.29)	23410	10.24	(10.1, 10.37)	9102	8.29	(8.12, 8.46)		1987	4.23	(4.05, 4.42)	14699	5.05	(4.97, 5.13)	5238	3.76	(3.66, 3.87)
Colon and Rectum	20476	52.95	(52.23, 53.68)	123114	53.64	(53.34, 53.94)	61466	55.76	(55.31, 56.2)		17922	37.9	(37.34, 38.45)	118033	40.06	(39.83, 40.29)	57394	41.34	(41.01, 41.68)
Liver and Intrahepatic Bile Duct	4363	10.66	(10.35, 10.98)	25349	10.36	(10.23, 10.49)	9564	8.17	(8.01, 8.34)		1686	3.58	(3.41, 3.75)	10191	3.53	(3.46, 3.6)	3919	2.84	(2.75, 2.93)
Gallbladder	286	0.76	(0.67, 0.85)	1786	0.8	(0.77, 0.84)	762	0.72	(0.67, 0.78)		641	1.36	(1.25, 1.46)	4390	1.49	(1.45, 1.53)	1652	1.18	(1.13, 1.24)
Pancreas	5033	13.04	(12.68, 13.4)	31230	13.65	(13.5, 13.81)	14887	13.59	(13.37, 13.8)		4786	10.07	(9.78, 10.35)	31633	10.66	(10.55, 10.78)	14134	10.06	(9.89, 10.22)
Larynx	2351	5.88	(5.65, 6.12)	13660	5.77	(5.67, 5.86)	8567	7.3	(7.14, 7.45)		555	1.21	(1.11, 1.31)	3334	1.18	(1.14, 1.22)	2269	1.67	(1.61, 1.74)
Lung and Bronchus	28274	74.08	(73.22, 74.95)	158590	70.2	(69.85, 70.54)	101588	92.11	(91.54, 92.68)		24446	52.43	(51.78, 53.09)	149833	52.09	(51.82, 52.35)	82339	59.89	(59.48, 60.3)
Lung: Adenocarcinoma	8867	23.01	(22.53, 23.49)	52105	22.85	(22.65, 23.04)	28194	25.29	(24.99, 25.58)		9128	19.71	(19.31, 20.12)	58454	20.51	(20.34, 20.67)	27189	19.88	(19.64, 20.11)
Lung: Squamous Cell	6536	17.11	(16.69, 17.52)	33875	15.03	(14.87, 15.19)	25254	22.71	(22.43, 22.99)		3758	8.14	(7.88, 8.4)	20948	7.38	(7.28, 7.47)	13618	9.97	(9.81, 10.14)
Lung: Small Cell	3332	8.44	(8.15, 8.73)	18565	8	(7.88, 8.11)	13955	12.21	(12, 12.41)		3247	7.03	(6.79, 7.27)	19152	6.78	(6.69, 6.88)	13435	9.83	(9.66, 9.99)
Melanoma of the Skin	12803	32.21	(31.65, 32.77)	69910	29.69	(29.47, 29.91)	36591	32.4	(32.07, 32.73)		8711	19.32	(18.91, 19.72)	50449	18.56	(18.4, 18.72)	26774	21.04	(20.79, 21.29)
Breast	425	1.1	(1, 1.21)	2793	1.22	(1.17, 1.26)	1245	1.12	(1.06, 1.19)		57349	125.4	(124.37, 126.43)	367529	131.84	(131.42, 132.27)	168875	126.23	(125.62, 126.83)
Breast: HR Positive	360	0.93	(0.83, 1.03)	2317	1.01	(0.96, 1.05)	1036	0.93	(0.87, 0.99)		41673	91.05	(90.18, 91.93)	270354	96.93	(96.57, 97.3)	123622	92.28	(91.77, 92.8)
Breast: HR Negative	18	0.05	(0.03, 0.07)	78	0.03	(0.03, 0.04)	45	0.04	(0.03, 0.05)		9230	20.5	(20.08, 20.92)	55038	20.1	(19.93, 20.27)	27957	21.28	(21.03, 21.53)
Cervix Uteri	0	0	NA	0	0	NA	0	0	NA		3659	8.46	(8.19, 8.73)	21128	8.19	(8.08, 8.3)	9496	7.84	(7.68, 8)
Corpus and Uterus NOSe	0	0	NA	0	0	NA	0	0	NA		10321	22.34	(21.91, 22.77)	70710	24.99	(24.8, 25.17)	32313	23.75	(23.49, 24)
Ovary	0	0	NA	0	0	NA	0	0	NA		6038	13.05	(12.72, 13.38)	38818	13.8	(13.67, 13.94)	18102	13.44	(13.25, 13.64)
Prostate	53297	135	(133.85, 136.15)	352969	149.24	(148.75, 149.73)	171853	149.55	(148.85, 150.26)		0	0	NA	0	0	NA	0	0	NA
Urinary Bladder	14107	37.75	(37.13, 38.38)	90176	40.59	(40.33, 40.86)	42983	40.47	(40.09, 40.86)		4162	8.78	(8.51, 9.05)	29665	10.04	(9.93, 10.16)	13246	9.48	(9.32, 9.64)
Kidney and Renal Pelvis	7953	19.79	(19.35, 20.22)	48645	20.39	(20.21, 20.57)	23855	20.72	(20.45, 20.98)		4568	9.91	(9.62, 10.2)	28847	10.23	(10.11, 10.35)	14549	10.77	(10.59, 10.94)
Brain	3213	7.74	(7.47, 8)	19367	8.03	(7.92, 8.15)	9463	8.22	(8.05, 8.38)		2513	5.51	(5.3, 5.73)	14872	5.51	(5.42, 5.6)	7423	5.78	(5.65, 5.91)
Thyroid	2142	5.09	(4.88, 5.31)	15092	6.08	(5.98, 6.18)	7040	5.95	(5.81, 6.09)		6339	14.47	(14.11, 14.83)	46174	17.87	(17.71, 18.03)	20869	17.1	(16.87, 17.33)
Non-Hodgkin Lymphoma	8981	22.81	(22.34, 23.28)	58726	25.21	(25.01, 25.42)	27436	24.75	(24.46, 25.05)		7373	15.82	(15.46, 16.19)	50016	17.49	(17.34, 17.65)	23472	17.2	(16.98, 17.42)
Myeloma	2640	6.85	(6.59, 7.11)	16449	7.18	(7.07, 7.29)	7870	7.22	(7.06, 7.38)		1966	4.18	(3.99, 4.36)	12776	4.4	(4.32, 4.47)	6097	4.39	(4.28, 4.5)
Chronic Lymphocytic Leukemia	2154	5.68	(5.44, 5.92)	15207	6.68	(6.57, 6.78)	7890	7.3	(7.14, 7.47)		1423	2.97	(2.82, 3.13)	10275	3.47	(3.4, 3.54)	5374	3.83	(3.73, 3.93)
Acute Myeloid Leukemia	1701	4.35	(4.14, 4.55)	10919	4.79	(4.7, 4.88)	5370	4.97	(4.83, 5.1)		1331	2.88	(2.73, 3.04)	9044	3.22	(3.15, 3.28)	4440	3.33	(3.23, 3.42)
a age-adjusted (2000 US standard) cancer incidence rates among whites for malignant neoplasms diagnosed during the years 2000-2012 from the Surveillance, Epidemiology and End Results (SEER) program, using SEER*Stat software
b The position in the time zone (PTZ) is defined as the difference between the population centroid of the county and the line of longitude from which each United States time zone is based in units of degrees.
c Ordered by organ systems, based on SEER Statistics Review 1975-2013
d Exclude lip and salivary glands
e Not otherwise specified
